# Supplementary material
Source: Springer Nature journal article supplement (https://www.springermedizin.de/resource/supplementary/12990_2008_194_MOESM1_ESM.pdf/9612760)
Supplement: MOESM1 [file 9612760]

# Analgesia time-course

Methanandamide

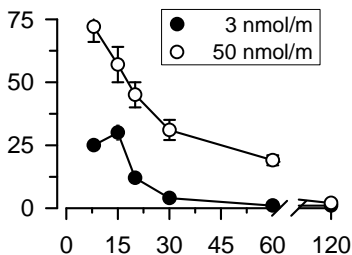

ACEA

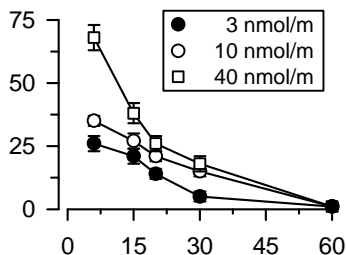

WIN55,212-2

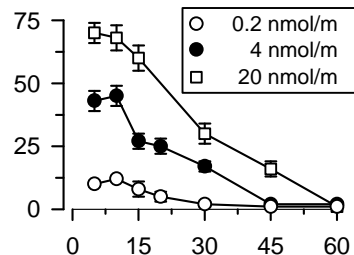

Interval post-cannabinoid, min

## Acute tolerance (+ 24 h)

Methanandamide 50 nmol/m

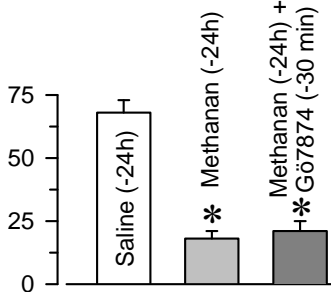

ACEA 40 nmol/m

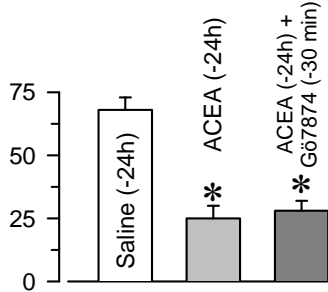

WIN55,212-2 20 nmol/m

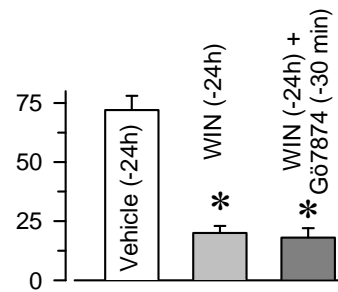

## Recovery from acute tolerance

Methanandamide 50 nmol/m

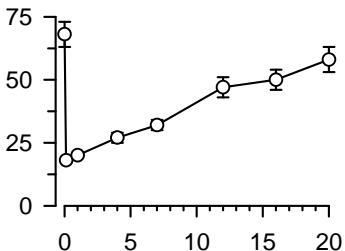

ACEA 40 nmol/m

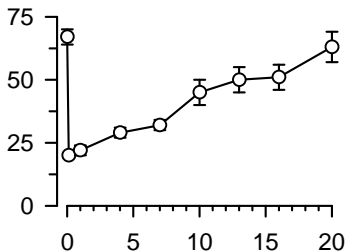

WIN55,212-2 20 nmol/m

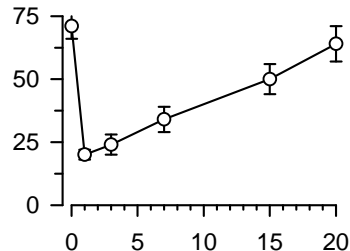

Days elapsed after an acute dose

Maximum Possible Effect, %
